# Supplementary material
Source: PubMed Central journal article supplement (PMC5321815)
Supplement: NIHMS839078-supplement-1.pdf [file NIHMS839078-supplement-1.pdf]

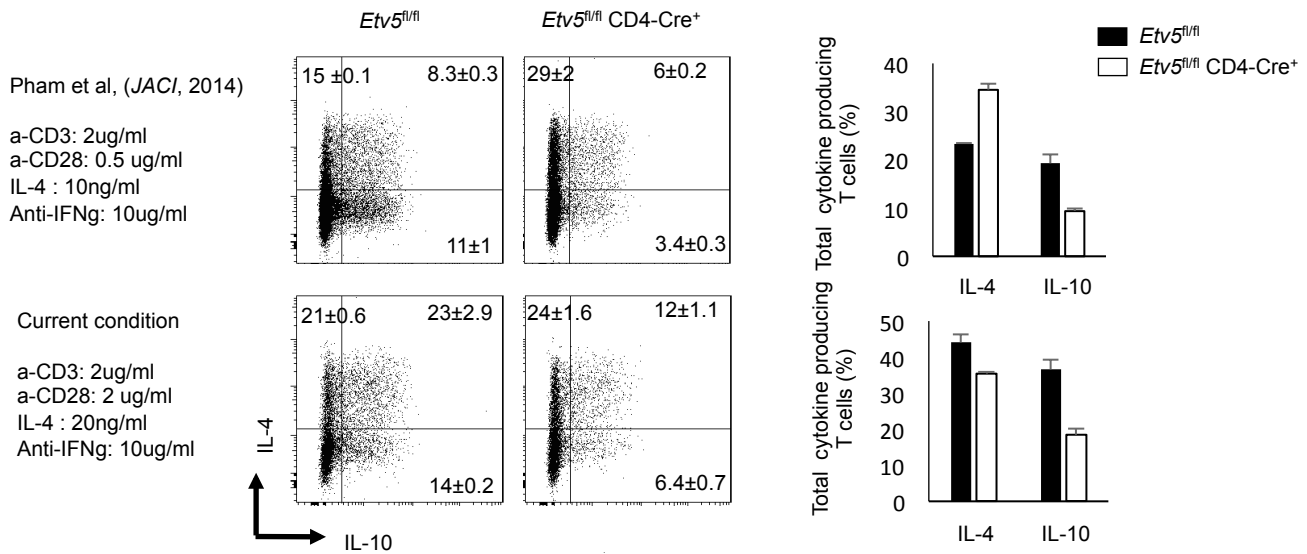

Supplementary Figure 1. Strength of signal determines the effect of *Etv5*-deficiency on IL-4 production. Naïve CD4 T cells from wild type or *Etv5*-deficient T cells were cultured under Th2 conditions described in Pham et al (top) or in this report (bottom). Sample dot plots (left) or averages of several experiments indicating the total cytokine-producing cells (right) demonstrate that IL-4 is enhanced in the former conditions, but not in the latter, while IL-10 is decreased in both conditions.
